# Supplementary material for: Single-cell omics analysis reveals functional diversification of hepatocytes during liver regeneration
Source: JCI journal article supplement (doi:10.1172/jci.insight.141024), 2020-11-18
Supplement: sd1 [file 1]

Figure S1

A

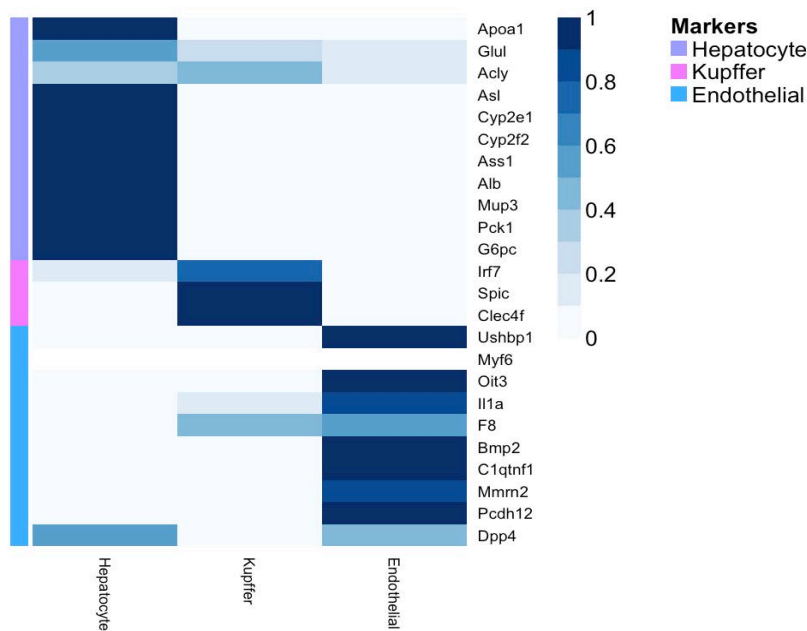

B

| Tissue | Condition | Gender | Age   | Hepatocytes | Kupffer cells | Endothelial cells |
|--------|-----------|--------|-------|-------------|---------------|-------------------|
| liver  | PHx48h    | male   | adult | 0.9589439   | 0.01895047    | 0.022105632       |
| liver  | PHx48h    | male   | adult | 0.9559730   | 0.01865062    | 0.025376421       |
| liver  | PHx48h    | male   | adult | 0.9559757   | 0.01865023    | 0.025374104       |
| liver  | PHx0h     | male   | adult | 0.9821886   | 0.01389723    | 0.003914131       |
| liver  | PHx0h     | male   | adult | 0.9719966   | 0.01701637    | 0.010987019       |
| liver  | PHx0h     | male   | adult | 0.9785515   | 0.00000000    | 0.021448470       |

C

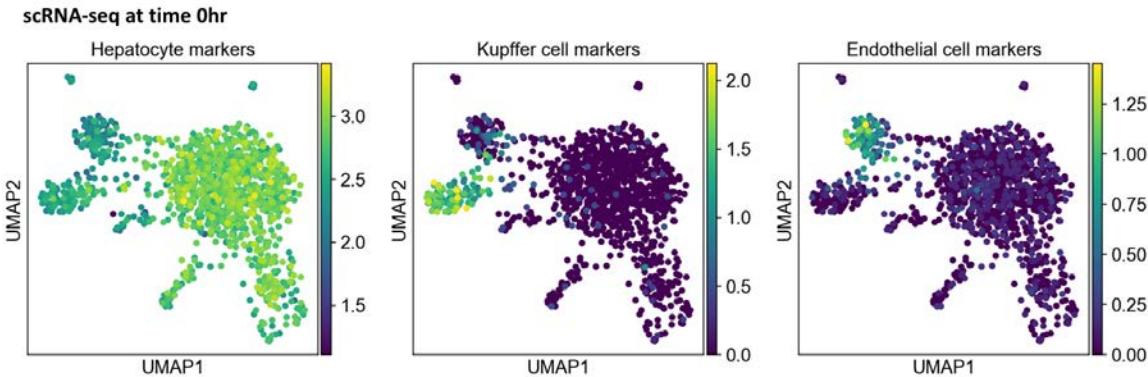

D

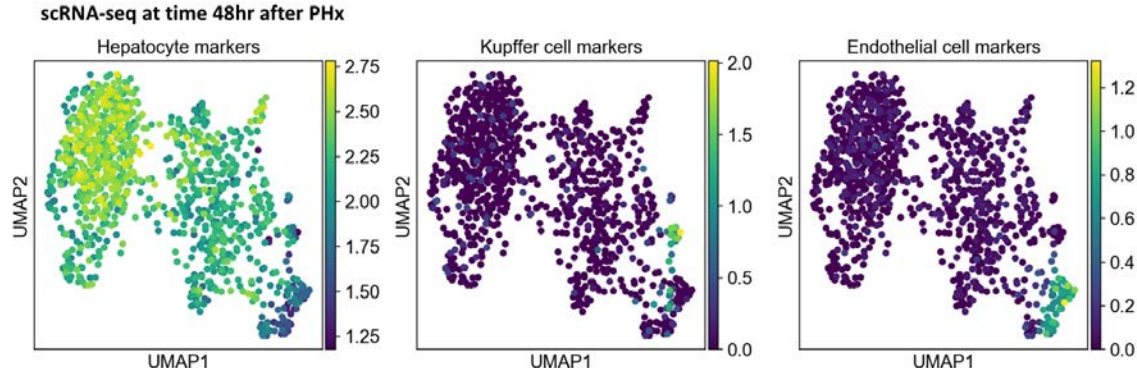

**Figure S1. Deconvolution of single cell RNA-seq data demonstrates little contamination of the hepatocyte preparation by other cell types.**

- Cell types signatures including hepatocytes, Kupffer cells and Endothelial cells derived from previously published single cell RNA-seq data (ref.9).
  - Proportions of each cell type in healthy livers (PHx0h, n=3) and 48h PHx livers (PHx48h, n=3).
- C-D. UMAP plot of distinct cell types signatures at PHx0h (C) and PHx48h (D).

**Figure S2**

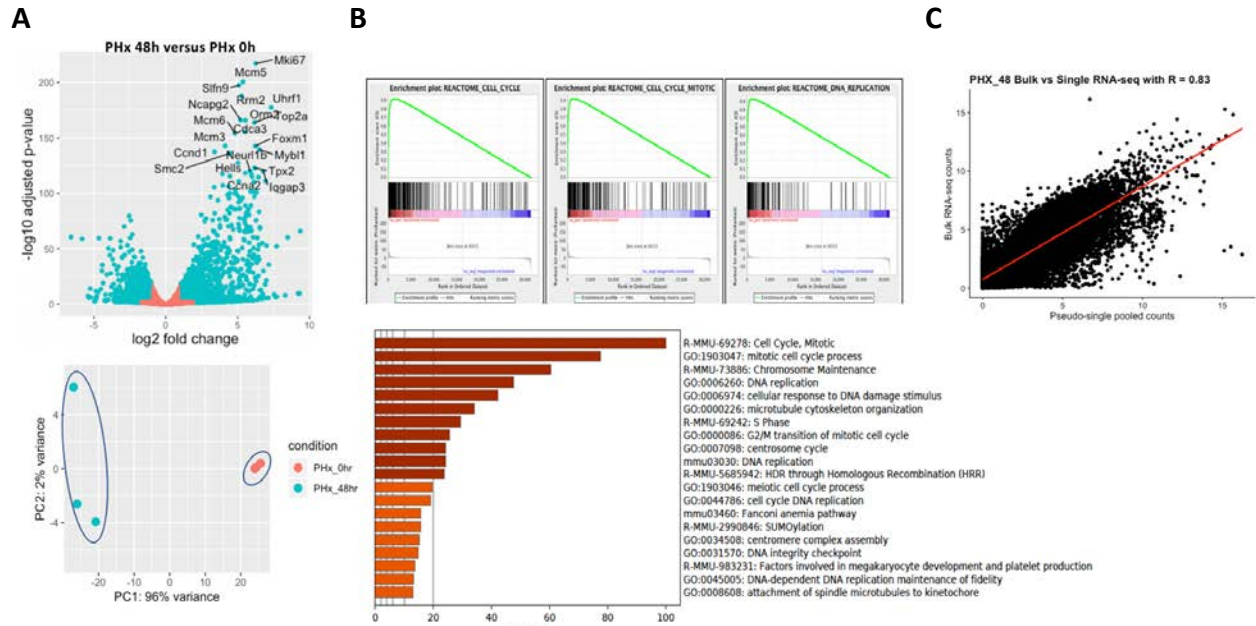

**Figure S2. Bulk RNA-seq analysis of hepatocytes before and at 48h post-PHx.**

- Volcano plot showing comparative bulk RNA-seq analysis of UD hepatocytes versus hepatocytes at PHx 48h (top). Result of principle component analysis (bottom).
- GSEA results (top) and GO terms (bottom) of enriched pathways in PHx 48h condition.
- Correlation plot showing the overall similarity between bulk RNA-seq and pseudo-bulk scRNA-seq datasets at PHx 48h.

Figure S3

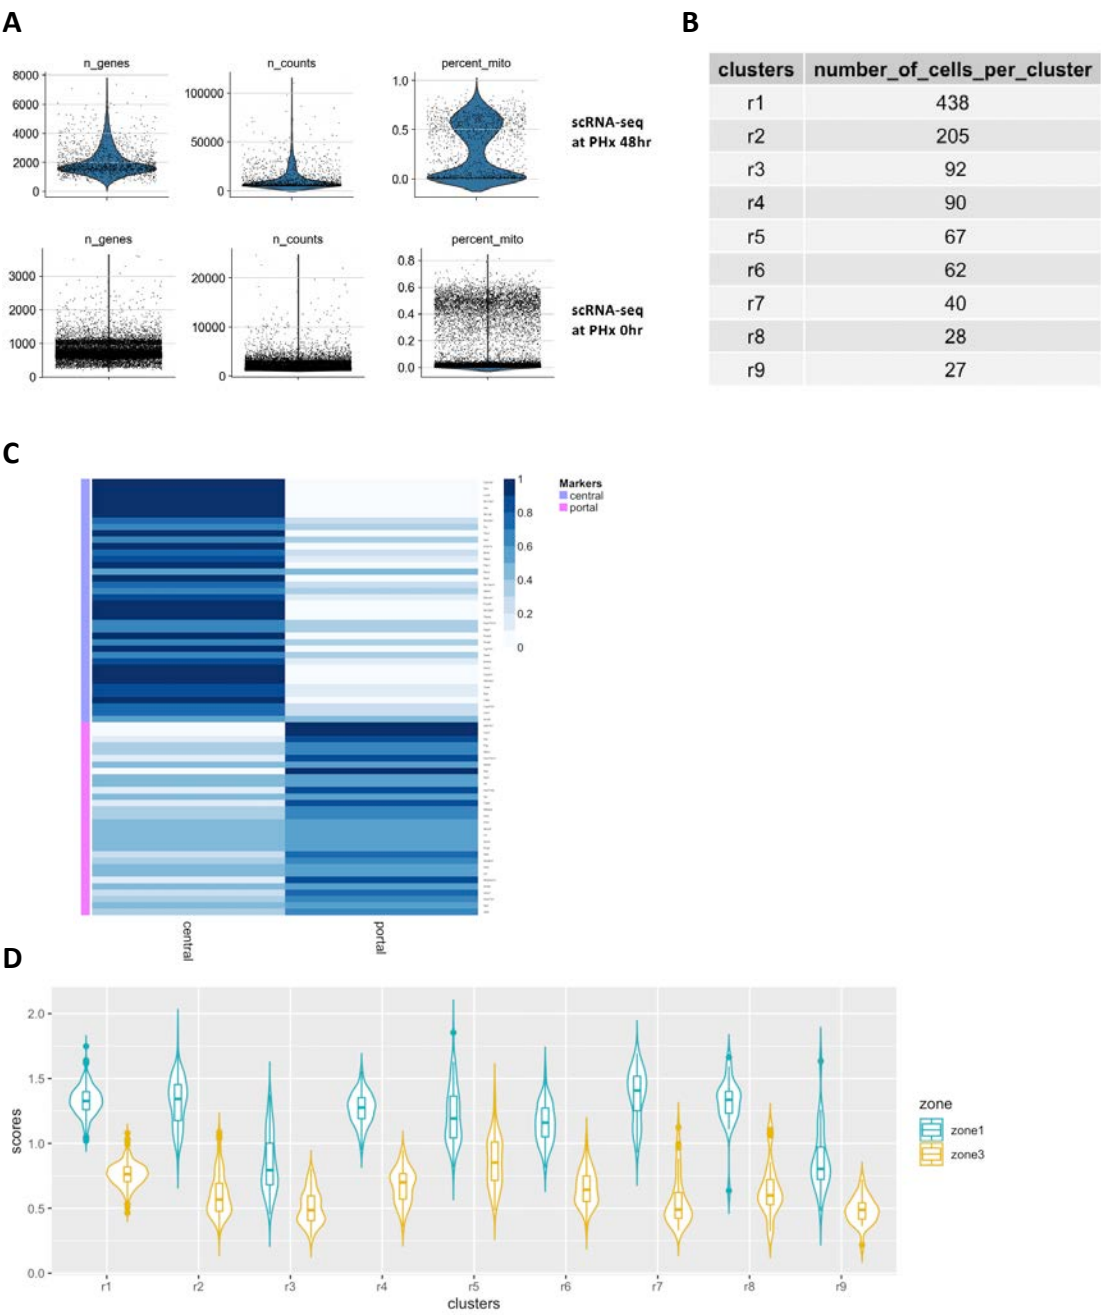



E

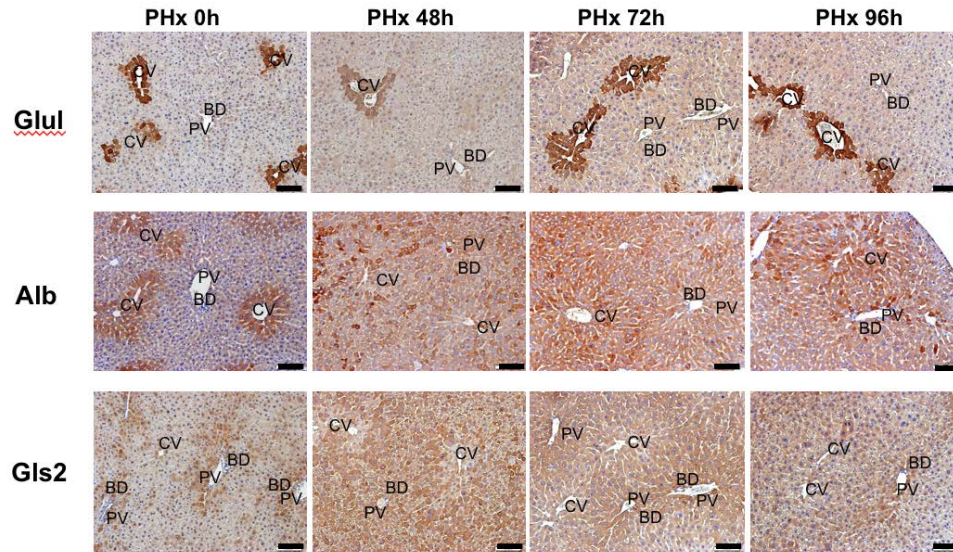

F

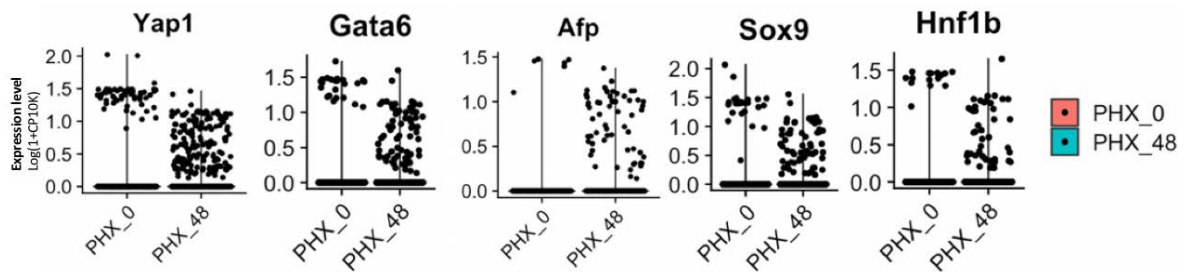

G

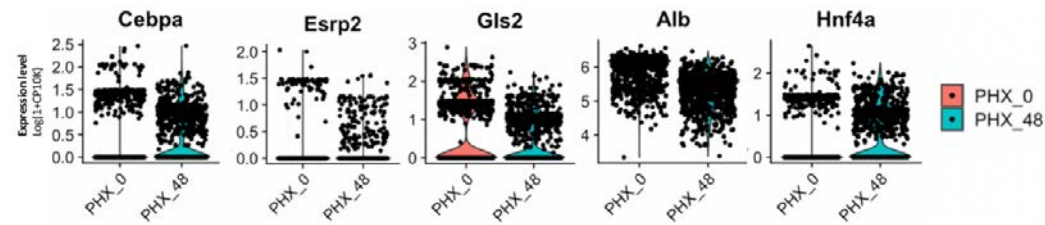

H

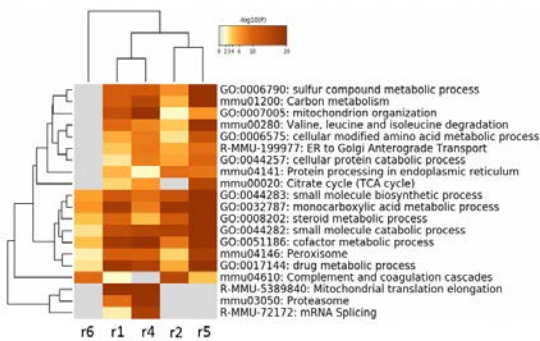

I

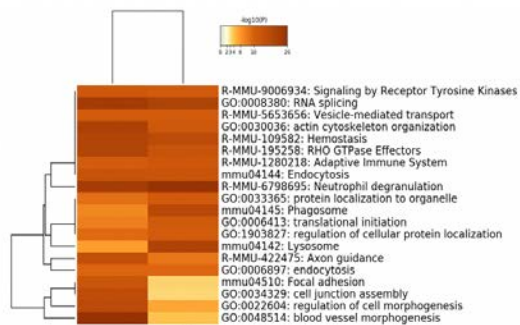

J

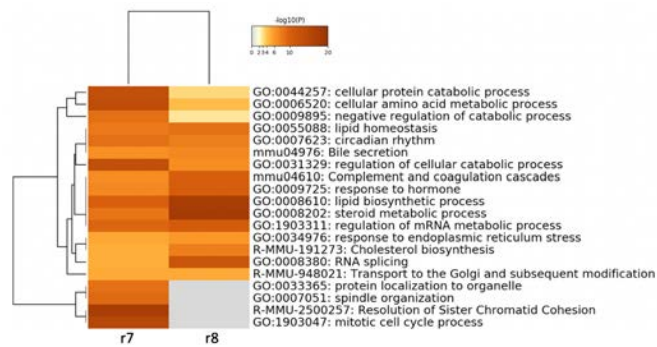

**Figure S3. Single cell RNA-seq analysis reveals heterogeneity of hepatocytes in regenerating liver.**

- A. Quality metrics of single cell RNA-seq data of hepatocytes at 48h PHx (top) and 0h PHx (bottom).
- B. Table showing the respective cell number for each cluster (r1-9).
- C. Central and portal zone signatures derived from previously published single cell RNA-seq data (ref. 9).
- D. Violin plot showing distribution of zonal signatures in each cluster (r1-9).
- E. IHC staining of various zonal markers before and after PHx. Scale bar = 100uM
- F-G. Violin plots showing the expression of representative markers for stem/progenitor cells (F) and mature hepatocytes (G).
- H. Enriched GO terms for group A including r1, r2, r4, r5 and r6.
- I. Enriched GO terms for group B including r3 and r9.
- J. Enriched GO terms for group C including r7 and r8.

Figure S4

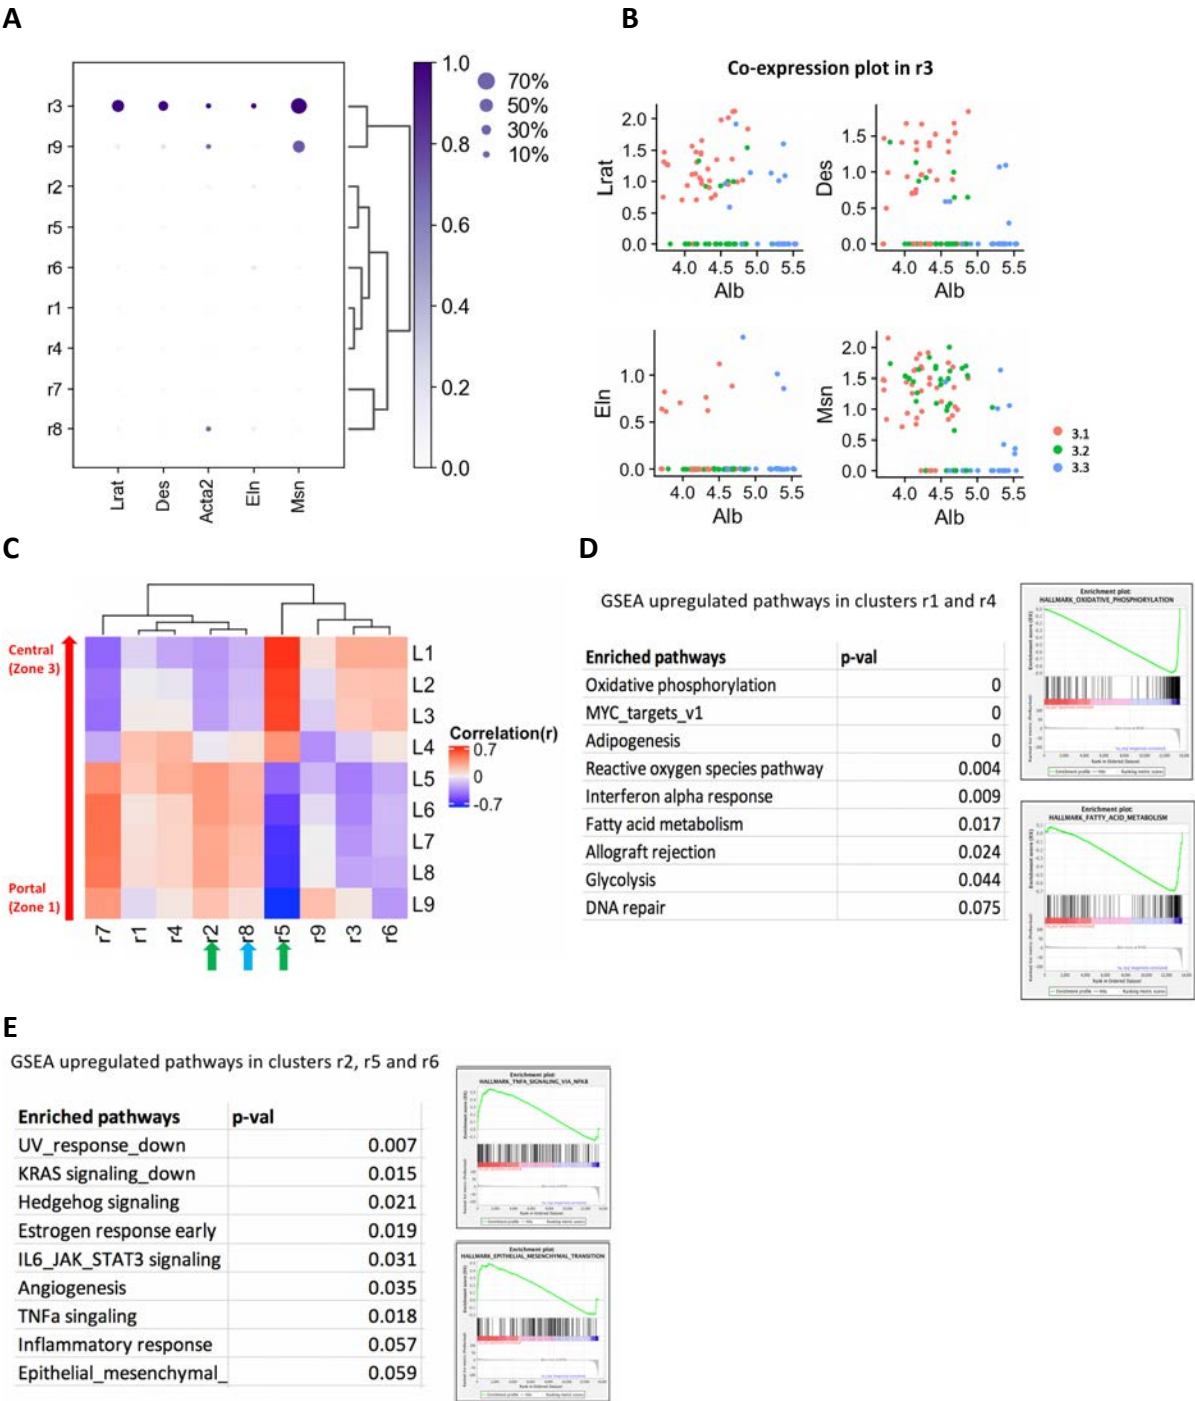

**Figure S4. Refined analysis of regenerative clusters demonstrates functional heterogeneity.**

A. Dot plot showing expression of representative hepatic stellate cells (HSCs) genes in each cluster (r1-9).

B. Co-expression plot showing various markers in r3.

C. Heatmap showing zonal enrichment for each cluster (r1-9).

D-E. GSEA results showed pathways enriched in clusters r1 and r4 (D) and enriched pathways in clusters r2, r5 and r6 (E).

Figure S5

A

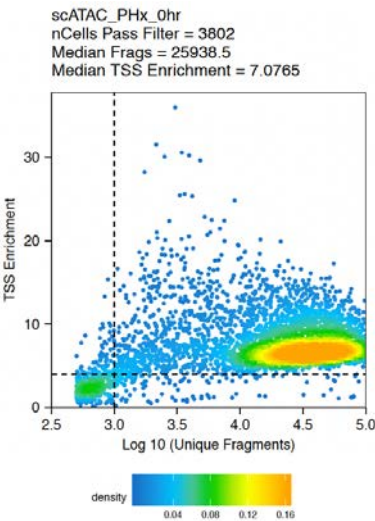

B

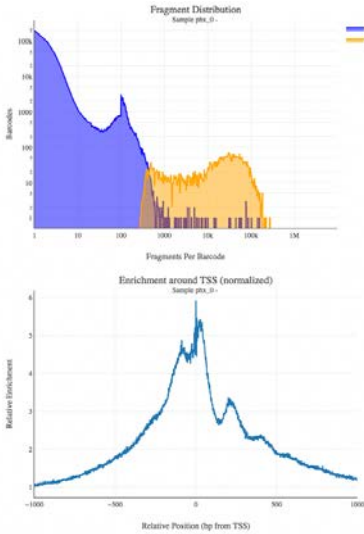

C

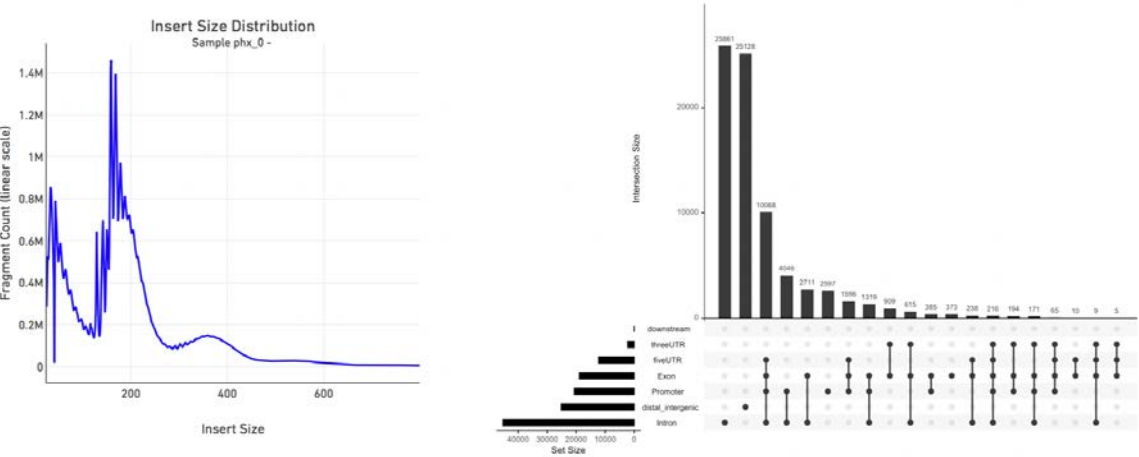

D

Hepatocyte markers

UMAP of IterativeLSI colored by  
GeneScoreMatrix : ApoA1

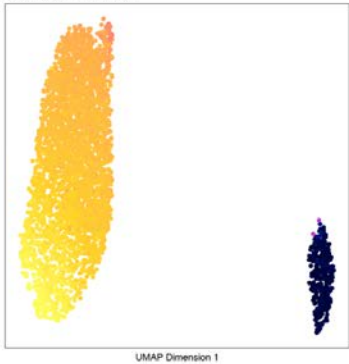

UMAP of IterativeLSI colored by  
GeneScoreMatrix : Ass1

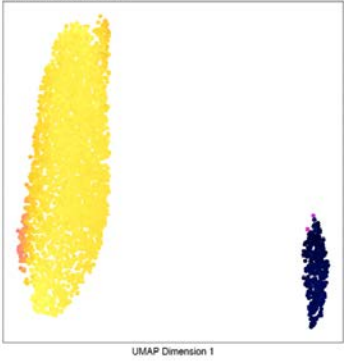

UMAP of IterativeLSI colored by  
GeneScoreMatrix : Alb

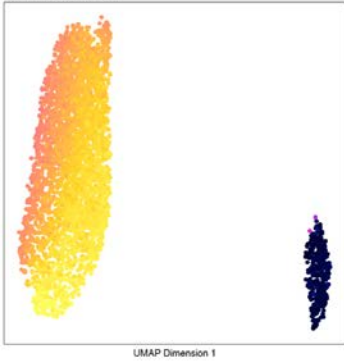



E

### Kupffer cells markers

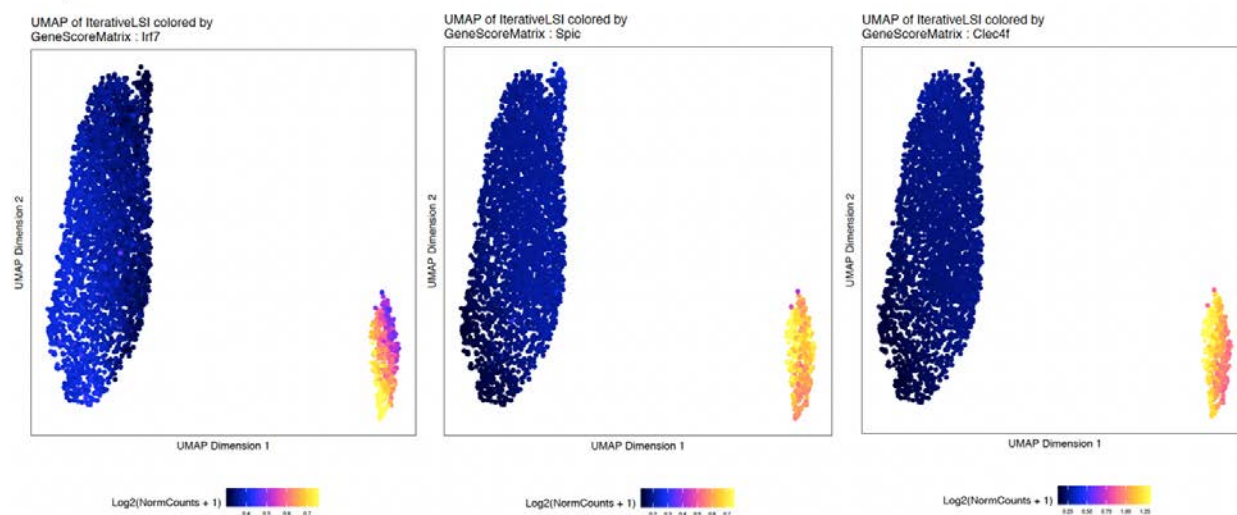

F

### Endothelial cells markers

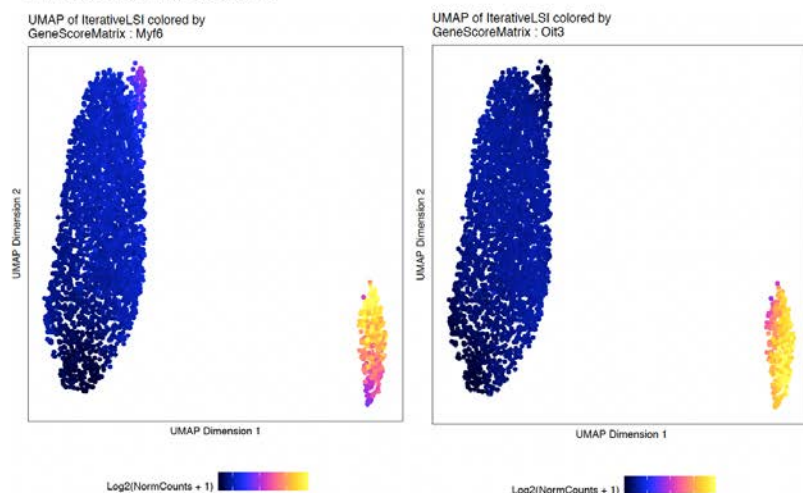

G

|    | C2      | C4    | C5     | C3      |
|----|---------|-------|--------|---------|
| L1 | 0.2     | -0.04 | -0.11  | -0.4*** |
| L2 | 0.16    | 0.06  | 0.04   | -0.28*  |
| L3 | 0.18    | 0.08  | 0.11   | -0.23   |
| L4 | 0.17    | 0.19  | 0.35** | 0.08    |
| L5 | -0.05   | 0.1   | 0.26*  | 0.46*** |
| L6 | -0.14   | 0.07  | 0.13   | 0.43*** |
| L7 | -0.17   | 0.02  | 0.06   | 0.38*** |
| L8 | -0.18   | -0.02 | 0.01   | 0.33**  |
| L9 | -0.27** | -0.15 | -0.2   | 0.11    |

\*\*\*P<0.001, \*\*P<0.01, \*P<0.05

**Figure S5. Quality metrics of single cell ATAC-seq data at time 0hr.**

A-B. Quality metrics of transcription starting sites (TSS) scores versus unique fragments per nucleus in 0hPHx (undamaged liver, UD) hepatocytes.

C. ScATAC-seq library fragment size distribution and their genome locations.

D-F. scATAC-seq UMAP projections of distinct cell types signatures at time 0h including hepatocytes (D), Kupffer cells (E) and Endothelial cells (F).

G. Table showing Pearson correlation coefficient calculated for hepatocyte clusters (C2-5) with the pre-defined (layer L1-9) zonal markers.



Figure S6

A

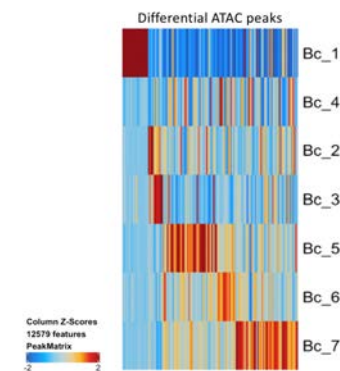

B

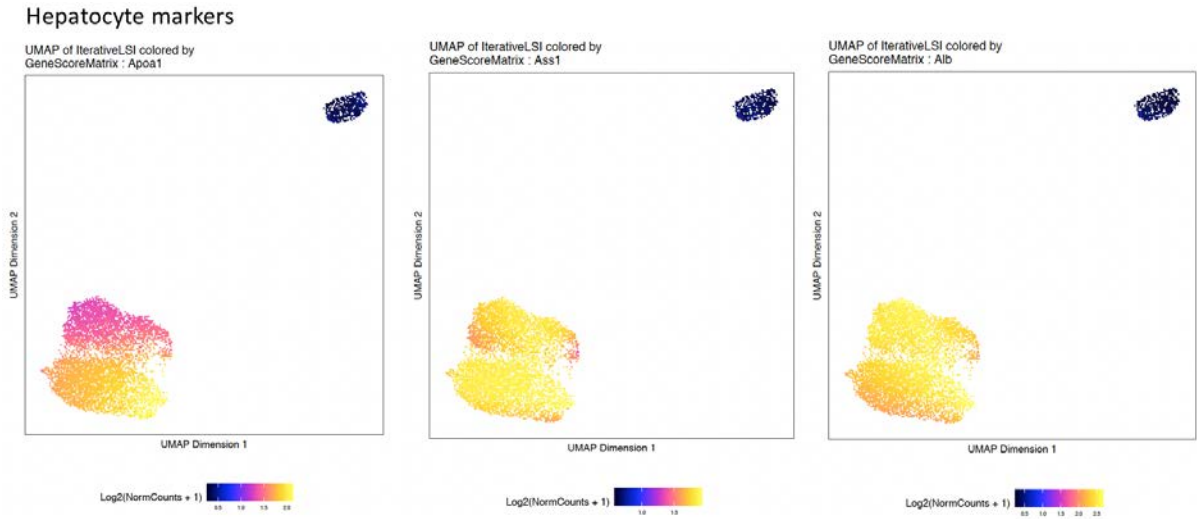

C

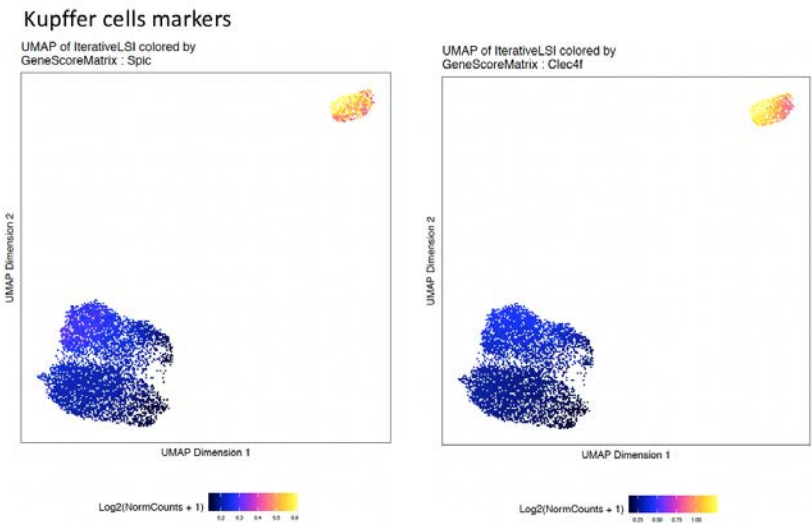

D

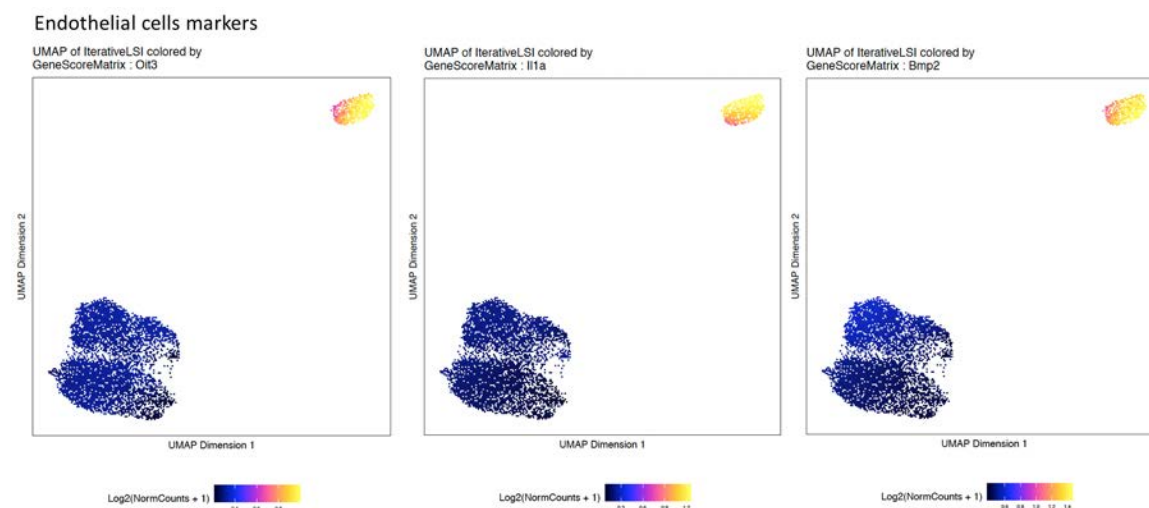

E

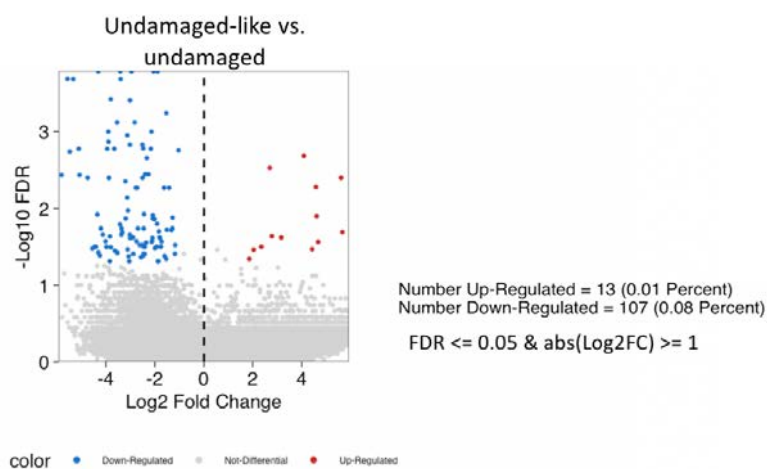

**Figure S6. Quality metrics of combined single cell ATAC-seq data at time 0hr and 48hr PHx.**

A. Heatmap showing differential peaks identified for each cluster (Bc\_1-7).

B-D. scATAC-seq UMAP projections of distinct cell types signatures including hepatocytes (B), Kupffer cells (C) and Endothelial cells (D).

E. Volcano plot showing distribution of chromatin regions with increased (red) or decreased (blue) accessibility in undamaged-like hepatocytes at 48h PHx.

**Figure S7**

**A**

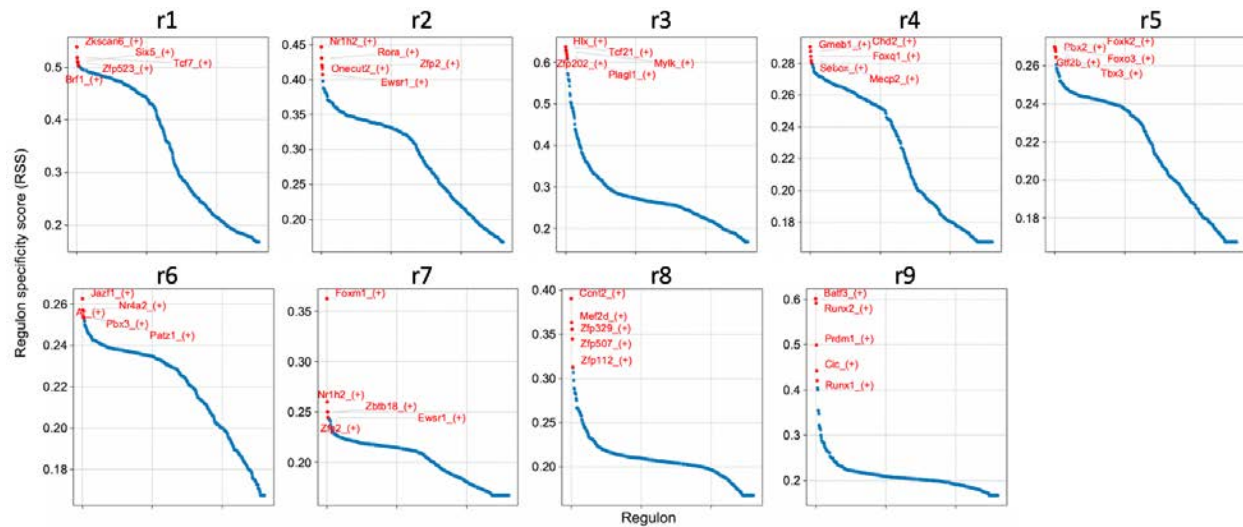

**B**

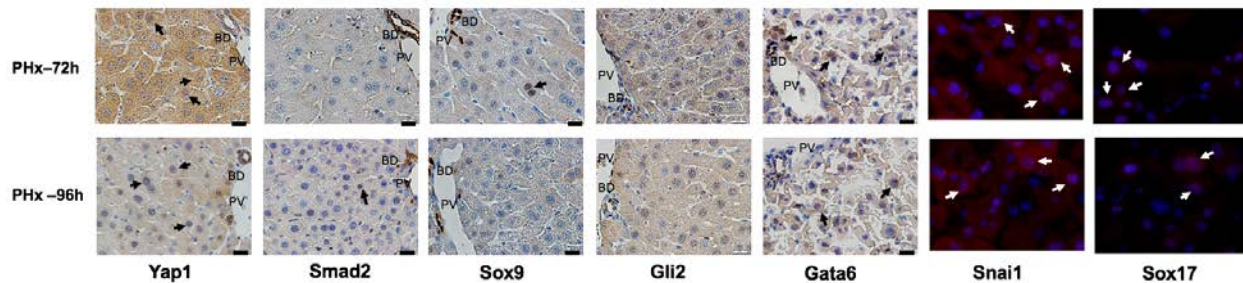

**Figure S7. Top ranked regulons in each regenerative cluster and immunohistochemical confirmation of regulon-related transcription factors in fetal-like cluster r8.**

- Top ranked regulons identified for each cluster r1-r9 of scRNA-seq data at 48h PHx.
- High magnification view of hepatocyte expression of transcription factors varies during the regenerative process. Immunohistochemical (IHC) and Immunofluorescence (IF) staining for Yap1, Smad2, Sox9, Gli2, Gata6 (brown), Snai1 and Sox17 (red) in representative sections from livers after partial hepatectomy (PH) counterstained with Hematoxylin or nuclear DAPI (blue). Black arrow in IHC stained results (Yap1, Smad2, Sox9, Gli2 and Gata6) indicates positive signal in hepatocyte nuclei. White arrows in IF stained results (Snai1 and Sox17) indicates positive signal in hepatocyte nuclei. Size bar: 50µm.

Figure S8

A

Hepatocyte markers

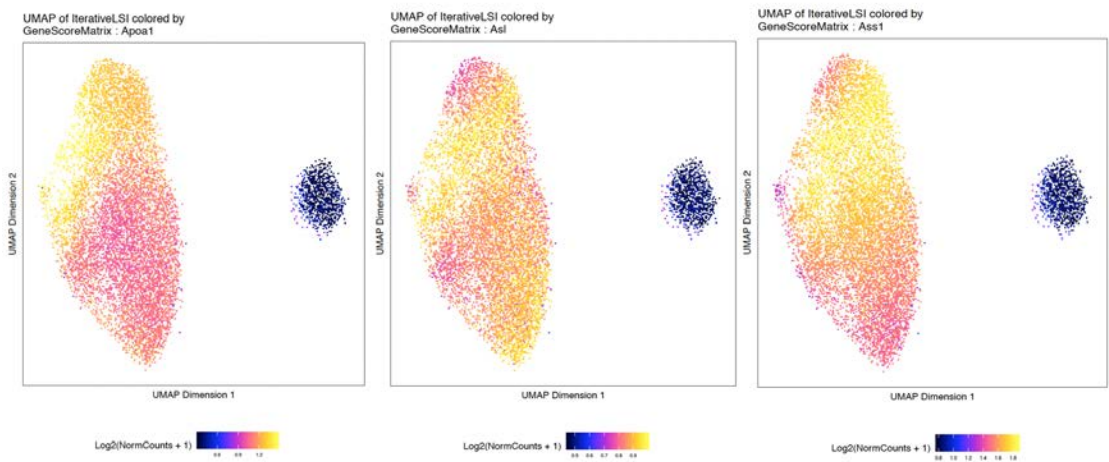

B

Kupffer cell markers

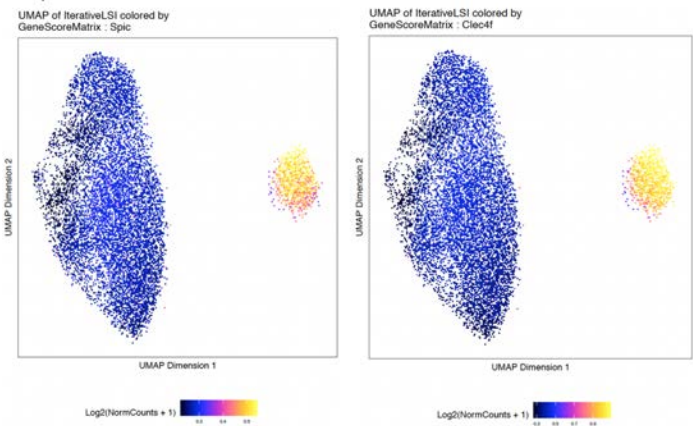

C

Endothelial cell markers

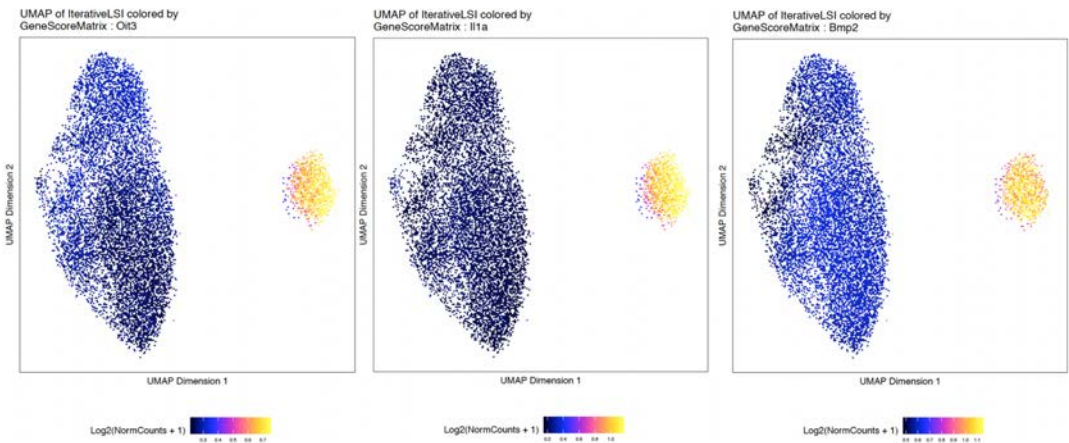



**D**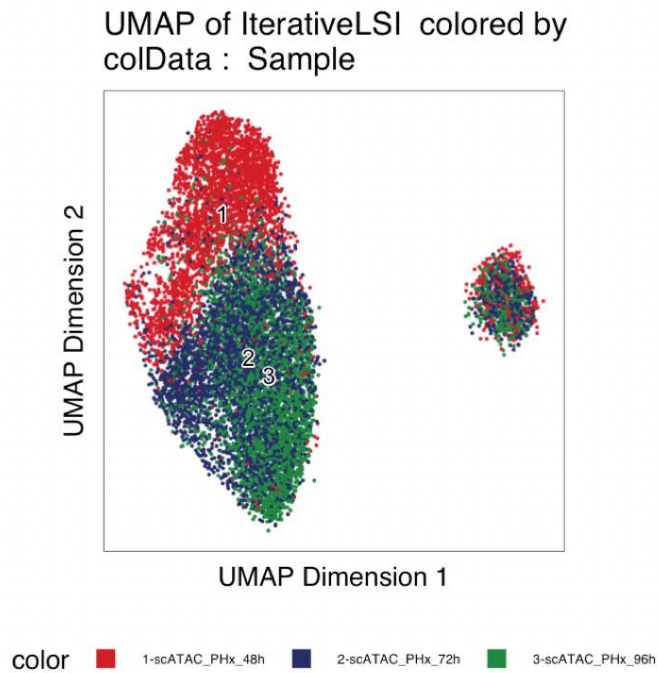**E**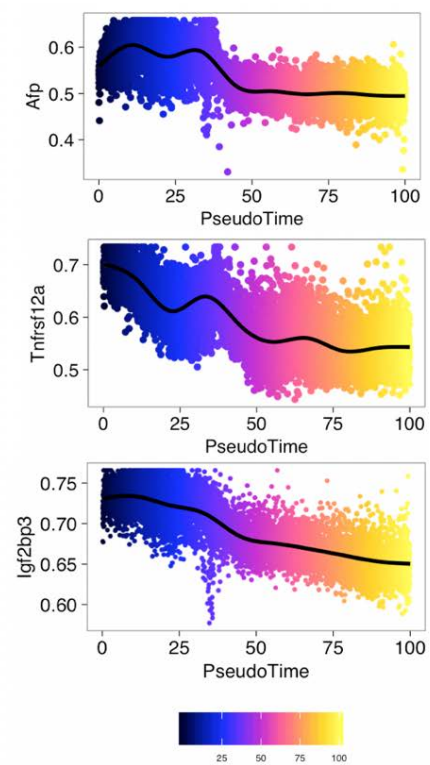

**Figure S8. Quality metrics of combined single cell ATAC-seq data at 48h, 72h and 96h PHx.**

A-C. scATAC-seq UMAP projections of distinct cell types signatures including hepatocytes (A), Kupffer cells (B) and Endothelial cells (C).

D. UMAP projection of combined data sets. Data are colored according to different time points.

E. Expression of representative fetal hepatocyte markers including Afp, Tnfrsf12a and Igf2bp3 across inferred pseudotime trajectory.

## Supplemental materials and methods

**IHC and IF.** Liver tissues were frozen in OCT or fixed in formalin, sectioned and immunohistochemistry was performed with the following antibodies: Yap1 (14074, Cell Signaling), Smad2 (sc-101153, Santa Cruz Biotechnology), Sox9 (AB5535, EMD Millipore), Sox17 (09-038-I, EMD Millipore; PA5-72815, Invitrogen), Gli2 (18-732-292462, Genway), Snai1 (ab180714, Abcam), Gata6 (ab22600, Abcam). Secondary antibodies were HRP-conjugated anti-rabbit (K4003, Dako) or anti-mouse (K4003, Dako) antibodies. Blocking and chromogenic detection was performed using the DAKO Envision System with DAB substrate according to the manufacturer's protocol. For detection of Snai1 and Sox17, Alexa Fluor 594 donkey anti-rabbit IgG (A10042, Carlsbad) were used. Nuclei were identified by DAPI positivity (H-1200, Vector Labs). Tissue sections were counterstained with Aqua Hematoxylin-INNOVEX (Innovex Biosciences).

**Bulk RNA-seq and analysis.** RNAs were extracted from fresh hepatocyte isolates using the TRIzol RNA Purification kit and cDNA libraries were made with NEBNext Ultra RNA Library Prep Kit from Illumina. Sample qualities were assessed by Agilent RNA Bioanalyzer chip traces before pooled and sequenced with an Illumina HiSeq 2500. Sequencing reads were trimmed using TrimGalore ([http://www.bioinformatics.babraham.ac.uk/projects/trim\\_galore/](http://www.bioinformatics.babraham.ac.uk/projects/trim_galore/)) and aligned to the mm10 reference genome using STAR.<sup>1</sup> Gene expression counts were generated using HTSeq<sup>2</sup> and DESeq2<sup>3</sup> was used to perform differential expression analyses (absolute log<sub>2</sub>FC ≥ 1 and q < 0.05). Cell type specific marker genes, including hepatocytes, Kupffer cells, and endothelial cells were generated by Halpern *et al.* 2007. Deconvolution was performed in bseqsc<sup>4</sup> using the gene expression matrix with values converted to TPM.

1. Dobin A, Davis CA, Schlesinger F, et al. STAR: ultrafast universal RNA-seq aligner. *Bioinformatics* 2013;29:15-21.
2. Anders S, Pyl PT, Huber W. HTSeq--a Python framework to work with high-throughput sequencing data. *Bioinformatics* 2015;31:166-9.
3. Love MI, Huber W, Anders S. Moderated estimation of fold change and dispersion for RNA-seq data with DESeq2. *Genome Biol* 2014;15:550.
4. M. Baron, A. Veres, S.L. Wolock, A. L. Faust, R. Gaujoux, A. Vetere, J. Hyoje Ryu, et al. A single-cell transcriptomic map of the human and mouse pancreas reveals inter- and intra-cell population structure. *Cell Systems*. 2016 Oct 26
